# Supplementary material
Source: PubMed Central journal article supplement (PMC5926203)
Supplement: NIHMS931834-supplement-1.pdf [file NIHMS931834-supplement-1.pdf]

**Figure S1. Cleavage of VAMP, Syx, and SNAP-25 family proteins by En-LC. Related to Figure 1.**

**(A)** GST-tagged VAMP2 (33-86) was incubated with or without En-LC. Samples were analyzed by SDS-PAGE and Coomassie Blue staining.

**(B)** GST-tagged VAMP2 (33-86) was incubated with En-LC. Samples were then analyzed by LC-MS/MS mass spectrometry.

**(C)** HA-tagged VAMP1, 3, 5, 7, and 8, Myc-tagged Sec22b and Ykt6, HA-tagged Syx 1A, 1B, 2, 3, 4, SNAP-23, SNAP-25, SNAP-29, and non-tagged VAMP4 were expressed in HEK293 cells via transient transfection. Cell lysates were incubated with En-LC (2  $\mu$ M, 1 h) and subjected to immunoblot analysis using the HA antibody, Myc antibody, or a VAMP4 antibody. Actin served as a loading control. En-LC cleaved VAMP1, VAMP3, Syx 1B, Syx 4, SNAP-25, and SNAP-23.

**(D)** Recombinant GST-VAMP2, Syx 1B, and Syx 4 were purified and incubated with En-LC (0.1  $\mu$ M) for the indicated time. Samples were analyzed by SDS-PAGE and Coomassie Blue staining.

**(E)** Recombinant Syx 1A, Syx 1B, and Syx 4 were incubated with high concentrations of En-LC (6  $\mu$ M) for the indicated time. Samples were analyzed by SDS-PAGE and Coomassie Blue staining. The cleavage products were marked with asterisks.

**(F, G)** The cleavage products described in panel E were analyzed by MS-LS/LS for Syx 1B (panel F, treated with trypsin) and Syx 4 (panel G, treated with chymotrypsin, as the toxin cleavage site contains a lysine). The eluted peptide peaks from the HPLC column are plotted over running time (RT, X axis). The upper panel showed the peak exists only in full-length

proteins, while the lower panel showed the peak only found in the cleavage products. The corresponding peptide sequences are shown in each panel.

**(H)** The sequence alignment of Syx 1A, 1B and Syx 4 around the BoNT/En cleavage site. BoNT/C cleavage site is also labeled.

**Figure S2. En-LC cleaves SNAP-25 at a novel site and generating full-length BoNT/En via sortase-mediated ligation. Related to Figure 1.**

**(A)** Recombinant SNAP-25 and SNAP-23 were incubated with En-LC (0.1  $\mu$ M) for the indicated time. A small portion of SNAP-25 appears to be cleaved and a cleavage product was marked by an asterisk. Cleavage of SNAP-23 was not detectable under this assay condition. These results suggest that En-LC hardly cleaves recombinant SNAP-25 and SNAP-23 *in vitro*. It is possible that the optimal cleavage of SNAP-25 and SNAP-23 by BoNT/En may require a proper cellular membrane environment.

**(B)** Immunoprecipitation assays were carried out using the SNAP-C antibody, for lysates of HEK293 cells transfected with HA-tagged SNAP-25 followed by incubation with En-LC *in vitro* for 1 h (left side), and for lysates of rat cortical neurons exposed to En-LC-H<sub>N</sub> ligated to BoNT/A-H<sub>C</sub> (which facilitates the entry of En-LC-H<sub>N</sub> into neurons, see panel G) in the medium for 24 h (right side). The antibody pulled down both full-length SNAP-25 and the C-terminal cleavage product (marked by asterisks), which were excised from the SDS-PAGE gel and subjected to mass spectrometry analysis.

**(C)** The full-length SNAP-25 and the C-terminal cleavage product isolated by immunoprecipitation as described in panel B were analyzed by MS-LS/LS. The eluted peptide peaks from the HPLC column are plotted over RT. Samples were treated with trypsin (left panels: HA-SNAP-25 isolated from HEK293 cells; right panels: endogenous SNAP-25 isolated from neurons.). The upper panel shows a peak found in full-length protein that is located on the N-terminal site of the cleavage site, thus this peak is missing from the cleavage product. The lower panel shows a peak found only in the cleavage product samples, but not in full-length SNAP-25 samples, suggesting that the starting residue of the cleavage products is D70. The same results were obtained for samples isolated from neurons and for samples isolated from HEK293 cells.

**(D)** Samples from HEK293 cells were also treated with chymotrypsin and analyzed by MS-LS/LS. The upper panel shows a peptide fragment found in full-length SNAP-25 sample, which covers the cleavage site. The lower panel shows a peptide found only in the cleaved SNAP-25, confirming that the N-terminal residue of the cleavage product is D70.

**(E)** SNAP-25 with a HA at its N-terminus was expressed in HEK293 cells. Cell lysates were incubated with En-LC and subjected to SDS-PAGE and immunoblot analysis (4-20% gradient gels for samples detected by the SNAP-N and HA antibodies in order to cover lower molecular weight peptides, and 12% gel for the sample analyzed by the SNAP-C antibody). Only the SNAP-C antibody was able to detect a cleavage product, which represents the C-terminal fragment of SNAP-25 generated by En-LC. We note that SNAP-25 in cell lysates showed an additional band with a lower molecular weight than the full-length SNAP-25, which is likely a degradation product.

**(F)** Sortase ligation reaction mixture and indicated control components, with or without DTT, were analyzed by SDS-PAGE and Coomassie Blue staining. The molecular weight marker is in lane 1 (starting from the left side). Full-length BoNT/En (En-FL) is marked by an asterisk. It separated into two smaller bands in the presence of DTT (lane 7), confirming that it is activated.

**(G)** An En-A chimeric toxin was generated by ligating En-LC-H<sub>N</sub> with A-H<sub>C</sub> by sortase, similar to generating En-FL. The sortase ligation mixture and indicated control components were analyzed by SDS-PAGE and Coomassie Blue staining. The ligated En-A chimeric toxin is marked with an asterisk.

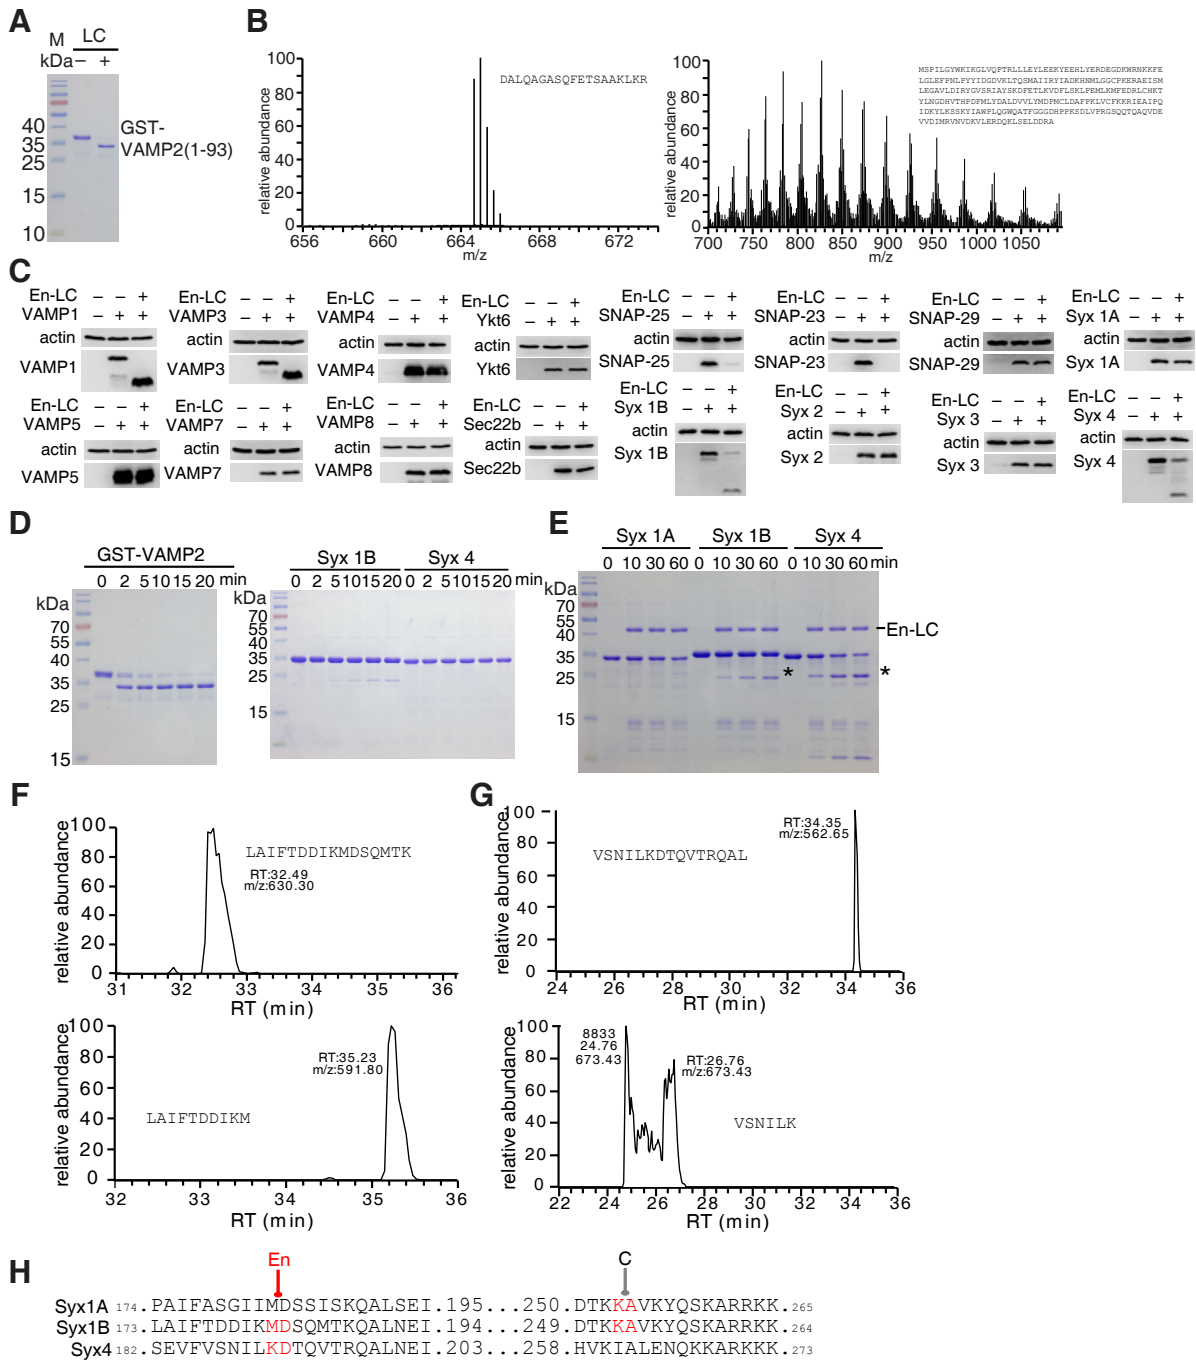

Figure S1

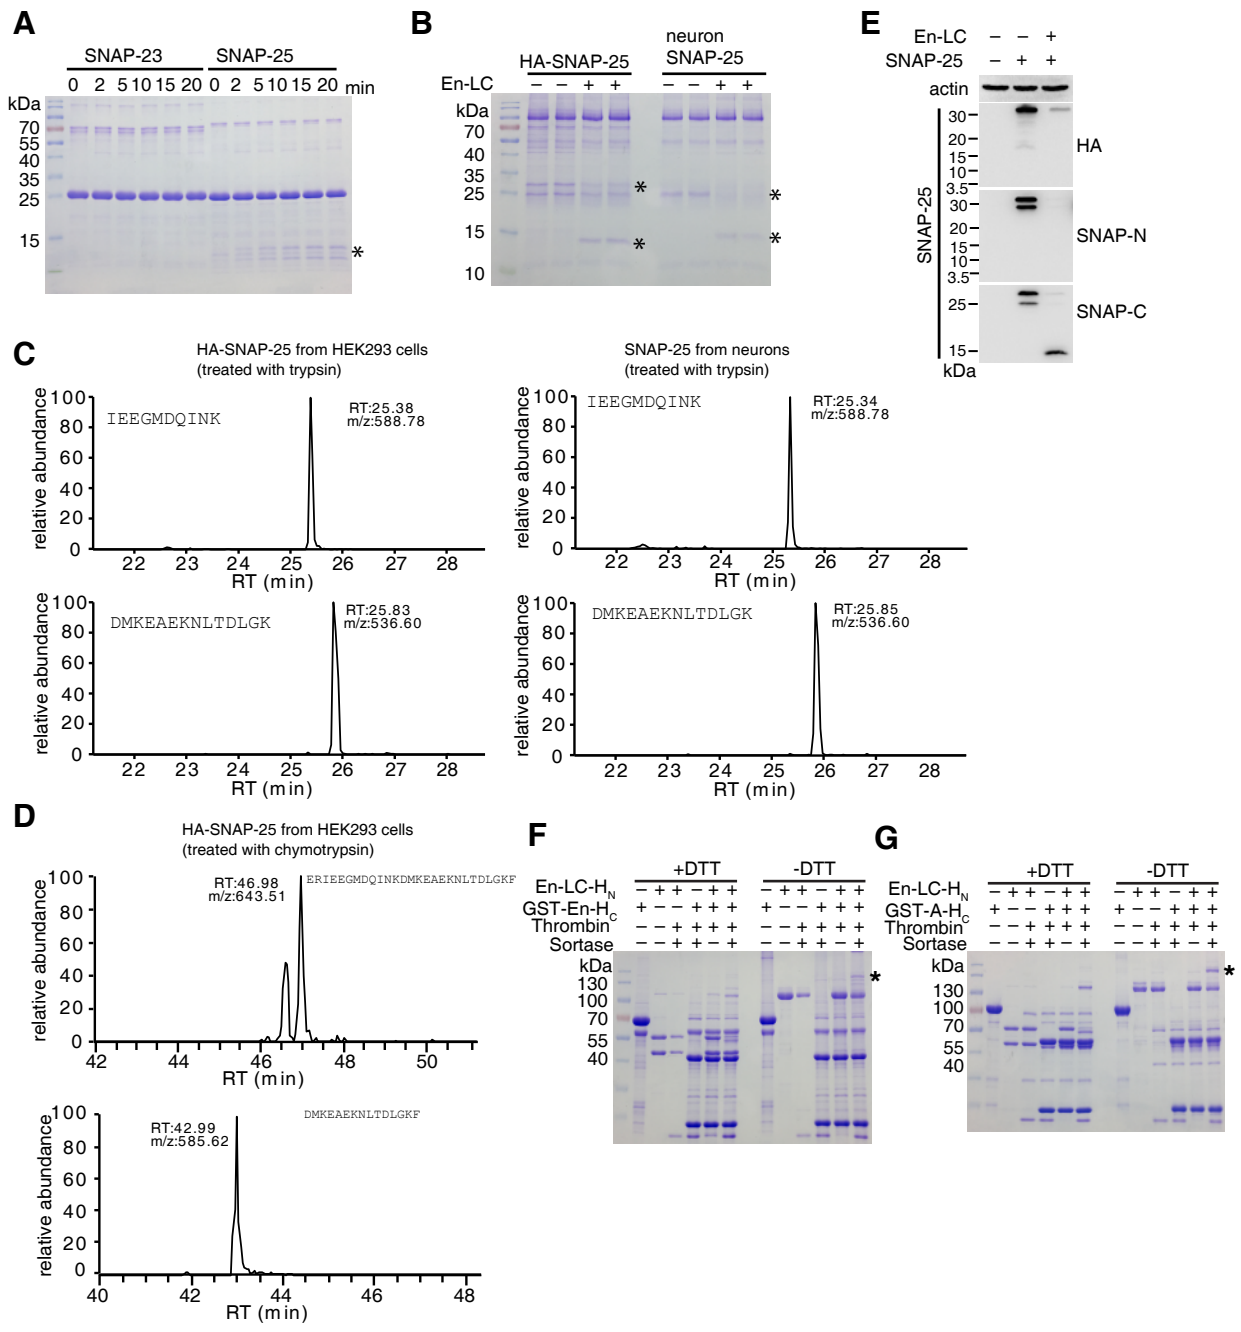

Figure S2
