# Supplementary material
Source: PubMed Central journal article supplement (PMC5926203)
Supplement: NIHMS931834-supplement-2.pdf [file NIHMS931834-supplement-2.pdf]

**Table S1.** *E. faecium* strains and genomes used for comparative genomics (Related to Figure 2).

| Strain    | Year of Isolation | Country | Source or characteristics   | Isolation site | Reference or accession                     | CRISPR <sup>a</sup> | Plasmid <sup>b</sup>    | Aminoglycoside | MLS               | Glycopeptide | Phenicol   | Cycline           |
|-----------|-------------------|---------|-----------------------------|----------------|--------------------------------------------|---------------------|-------------------------|----------------|-------------------|--------------|------------|-------------------|
| EnGen0038 | 2006              | NLD     | Hospitalized patient        | Blood          | Lebreton et al. 2013                       | -                   | <i>repUS15</i>          | -              | <i>msrC</i>       | -            | -          | -                 |
| Com12     | 2006              | USA     | Non-hospitalized individual | Feces          | Palmer et al. 2011                         | <i>cas1</i>         | <i>repUS15</i>          | -              | <i>msrC</i>       | -            | -          | -                 |
| EnGen0056 | 2000              | NLD     | Hospitalized patient        | Blood          | Lebreton et al. 2013                       | <i>cas1</i>         | -                       | -              | <i>msrC</i>       | -            | -          | -                 |
| EnGen0047 | 2004              | NLD     | Hospitalized patient        | Blood          | Lebreton et al. 2013                       | -                   | -                       | -              | <i>msrC</i>       | -            | -          | -                 |
| EnGen0003 | 2001              | IRL     | Non-hospitalized individual | Feces          | Lebreton et al. 2013                       | <i>cas1</i>         | <i>rep1, 2, 7, US15</i> | <i>aadE</i>    | <i>ermB, msrC</i> | -            | <i>cat</i> | <i>tetM, tetL</i> |
| 1_141_733 | 2005              | USA     | Hospitalized patient        | Wound          | Palmer et al. 2011                         | <i>cas1</i>         | <i>rep1, US15</i>       | -              | <i>msrC</i>       | -            | -          | -                 |
| EnGen0263 | 2008              | FRA     | Hospitalized patient        | na             | This study<br>NZ_AJAD000000000             | -                   | <i>rep7</i>             | -              | <i>msrC</i>       | <i>vanA</i>  | <i>cat</i> | -                 |
| IDI0629   | 2016              | USA     | Farm cow                    | Feces          | Formerly named DIV0629<br>NZ_NGLI000000000 | -                   | <i>repUS15</i>          | -              | <i>msrC</i>       | -            | -          | -                 |
| IDI0518   | 2016              | DEU     | Wild bird                   | Feces          | Formerly named DIV0518<br>NZ_NGLS000000000 | -                   | <i>repUS15</i>          | -              | <i>msrC</i>       | -            | -          | -                 |
| Com15     | 2007              | USA     | Non-hospitalized individual | Feces          | Palmer et al. 2011                         | -                   | <i>rep1, US15</i>       | -              | <i>msrC</i>       | -            | -          | -                 |
| EnGen0042 | 2001              | ESP     | Hospitalized patient        | Feces          | Lebreton et al. 2013                       | <i>cas1</i>         | <i>rep1, US15</i>       | -              | <i>msrC</i>       | -            | -          | -                 |
| EnGen0026 | 2000              | DEU     | Hospitalized patient        | na             | Lebreton et al. 2013                       | <i>cas1</i>         | <i>rep1, 14, US15</i>   | -              | <i>msrC</i>       | -            | -          | -                 |
| EnGen0015 | 1998              | NLD     | Non-hospitalized individual | Feces          | Lebreton et al. 2013                       | -                   | <i>repUS15</i>          | -              | <i>msrC</i>       | -            | -          | -                 |
| EnGen0033 | 2000              | DEU     | Hospitalized patient        | Blood          | Lebreton et al. 2013                       | -                   | <i>rep1, 2, US15</i>    | -              | <i>msrC</i>       | -            | -          | -                 |
| E980      | 1998              | NLD     | Non-hospitalized individual | Feces          | Zhang et al. 2010                          | -                   | <i>repUS15</i>          | -              | <i>msrC</i>       | -            | -          | -                 |
| EnGen0029 | 1964              | NOR     | Fish burger                 | na             | Lebreton et al. 2013                       | <i>cas1</i>         | <i>rep1, US15</i>       | -              | <i>msrC</i>       | -            | -          | -                 |
| EnGen0028 | 1956              | NOR     | Cheese                      | na             | Lebreton et al. 2013                       | <i>cas1</i>         | <i>rep1, 2, US15</i>    | -              | <i>msrC</i>       | -            | -          | -                 |
| LCT-EF90  | nd                | CHI     | Laboratory strain           | na             | Lebreton et al. 2013                       | <i>cas1</i>         | <i>rep1, US15</i>       | -              | <i>msrC</i>       | -            | -          | -                 |

<sup>a</sup> Predicted using the CRISPR finder online tool (<http://crispr.i2bc.paris-saclay.fr/>)

<sup>b</sup> Predicted using the PlasmidFinder online tool (<https://cge.cbs.dtu.dk>). The replication (*rep*) genes and families are reported.
