# Supplementary material
Source: PubMed Central journal article supplement (PMC5926203)
Supplement: NIHMS931834-supplement-4.pdf [file NIHMS931834-supplement-4.pdf]

**Table S3.** Primers (related to Key resources table)

| Name                                  | Function | Sequence                                             |
|---------------------------------------|----------|------------------------------------------------------|
| syx1A forward primer                  | pET28a   | GCCGCGCGGCAGCCATATGGCTAGCATGAAGGACCGAACCCAGG         |
| syx1A reverse primer                  | pET28a   | GGTGGTGGTGGTGTCTCGAGTGCGGCCGCTTACTTCTTCTCGCGTGCCTTG  |
| syx1B forward primer                  | pET28a   | GCCGCGCGGCAGCCATATGGCTAGCATGAAGGATCGGACTCAGG         |
| syx1B reverse primer                  | pET28a   | GGTGGTGGTGGTGTCTCGAGTGCGGCCGCTTACTTGGTGTCTGGACACGGC  |
| Syx4 forward primer                   | pET28a   | GCCGCGCGGCAGCCATATGGCTAGCATGCGCGACAGGACCCATG         |
| Syx4 reverse primer                   | pET28a   | GGTGGTGGTGGTGTCTCGAGTGCGGCCGCTTACTTTTTCTTCTCGCCTTC   |
| SNAP25 forward primer                 | pET28a   | GCCGCGCGGCAGCCATATGGCTAGCATGGCCGAGGACGCAGAC          |
| SNAP25 reverse primer                 | pET28a   | GGTGGTGGTGGTGTCTCGAGTGCGGCCGCTTAACCACTTCCCAGCATC     |
| SNAP23 forward primer                 | pET28a   | GCCGCGCGGCAGCCATATGGCTAGCATGGATGATCTATCACCAGAAG      |
| SNAP23 reverse primer                 | pET28a   | GGTGGTGGTGGTGTCTCGAGTGCGGCCGCTTAGCTGTCAATGAGTTTCTTTG |
| BoNT/En-H <sub>C</sub> forward primer | pGEX4T1  | CGGGATCCATGCAAGATAGCGAAGTG                           |
| BoNT/En-H <sub>C</sub> reverse primer | pGEX4T1  | CCG CTCGAGTTAGTCCTCTTTCCAACC                         |
